# Supplementary material for: AMiGA: Software for Automated Analysis of Microbial Growth Assays
Source: PubMed Central journal article supplement (PMC8409736; doi:10.1128/msystems.00508-21), 2021-07-13
Supplement: reviewer-comments.pdf [file reviewer-comments.pdf]

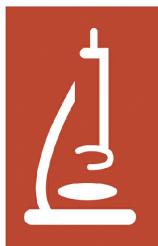

AMERICAN  
SOCIETY FOR  
MICROBIOLOGY

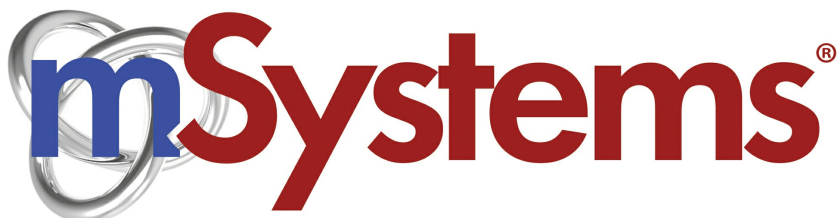

# AMiGA: software for automated Analysis of Microbial Growth Assays

Firas Midani, James Collins, and Robert Britton

*Corresponding Author(s): Firas Midani, Baylor College of Medicine*

---

## Review Timeline:

|                     |                |
|---------------------|----------------|
| Submission Date:    | April 26, 2021 |
| Editorial Decision: | June 2, 2021   |
| Revision Received:  | June 7, 2021   |
| Accepted:           | June 16, 2021  |

---

*Editor: Rafael Silva-Rocha*

*Reviewer(s): The reviewers have opted to remain anonymous.*

## Transaction Report:

(Note: With the exception of the correction of typographical or spelling errors that could be a source of ambiguity, letters and reports are not edited. The original formatting of letters and referee reports may not be reflected in this compilation.)

**DOI: <https://doi.org/10.1128/mSystems.00508-21>**

June 2, 2021

Dr. Firas S Midani  
Baylor College of Medicine  
Molecular Virology and Microbiology  
Houston, TX 77098

Re: mSystems00508-21 (AMiGA: software for automated Analysis of Microbial Growth Assays)

Dear Dr. Firas S Midani:

Thank you for submitting your manuscript to mSystems. We have completed our review and I am pleased to inform you that, in principle, we expect to accept it for publication in mSystems. However, acceptance will not be final until you have adequately addressed the reviewer comments.

Thank you for the privilege of reviewing your work. Below you will find instructions from the mSystemseitorial office and comments generated during the review.

### **Preparing Revision Guidelines**

To submit your modified manuscript, log onto the eJP submission site at <https://msystems.msubmit.net/cgi-bin/main.plex>. Go to Author Tasks and click the appropriate manuscript title to begin the revision process. The information that you entered when you first submitted the paper will be displayed. Please update the information as necessary. Here are a few examples of required updates that authors must address:

- Point-by-point responses to the issues raised by the reviewers in a file named "Response to Reviewers," NOT IN YOUR COVER LETTER.
- Upload a compare copy of the manuscript (without figures) as a "Marked-Up Manuscript" file.
- Each figure must be uploaded as a separate file, and any multipanel figures must be assembled into one file.
- Manuscript: A .DOC version of the revised manuscript
- Figures: Editable, high-resolution, individual figure files are required at revision, TIFF or EPS files are preferred

For complete guidelines on revision requirements, please see the Instructions to Authors at <https://msystems.asm.org/sites/default/files/additional-assets/mSys-ITA.pdf>. **Submissions of a paper that does not conform to mSystems guidelines will delay acceptance of your manuscript.**

Corresponding authors may [join or renew ASM membership](#) to obtain discounts on publication fees. Need to upgrade your membership level? Please contact Customer Service at [Service@asmusa.org](mailto:Service@asmusa.org).

Thank you for submitting your paper to mSystems.

The ASM Journals program strives for constant improvement in our submission and publication process. Please tell us how we can improve your experience by taking this quick [Author Survey](#).

Sincerely,

Rafael Silva-Rocha

Editor, mSystems

Journals Department  
American Society for Microbiology  
1752 N St., NW  
Washington, DC 20036  
E-mail: [peerreview@asmusa.org](mailto:peerreview@asmusa.org)  
Phone: 1-202-942-9338

### **Reviewer comments:**

Reviewer #1 (Comments for the Author):

In general terms, the authors have responded satisfactorily to my observations. However, there are still some minor comments and details that the authors should consider before accepting the manuscript.

-In Figure 2A the term Non-carbon control still appears

-The Materials and Methods section does not indicate where the data for *C. sedlakii* and *Y. Enterocolitica* come from. If it is mentioned that Growth data for ancestral strain and transposon mutants of *P. aeruginosa* were obtained from reference 28. This is indicated in the results section (line 315). In the materials section, it must be clear where all the data come from if they were not obtained experimentally.

L615: Data Availability? Where?

Reviewer #2 (Comments for the Author):

I previously reviewed this manuscript and the authors have thoroughly addressed all of my initial concerns, which were minor. The methodology, software, and documentation are a very important contribution and will be of broad interest.

Reviewer #3 (Comments for the Author):

The authors have appropriately taken into account most of my comments.

## Reviewer comments (Author response in red):

Reviewer #1 (Comments for the Author):

In general terms, the authors have responded satisfactorily to my observations. However, there are still some minor comments and details that the authors should consider before accepting the manuscript.

-In Figure 2A the term Non-carbon control still appears

Thank you for catching this error. We have corrected the figure by changing “No-carbon Control” to “Minimal Media”.

-The Materials and Methods section does not indicate where the data for *C. sedlakii* and *Y. Enterocolitica* come from. If it is mentioned that Growth data for ancestral strain and transposon mutants of *P. aeruginosa* were obtained from reference 28. This is indicated in the results section (line 315). In the materials section, it must be clear where all the data come from if they were not obtained experimentally.

L615: Data Availability? Where?

We initially combined the Software Availability section and the Data Availability section as a single section titled “Software implementation and data availability”. For clarity, we have separated them into their own individual sections. Now, we also include links to the public repositories where the data for *C. sedlakii*, *P. aeruginosa*, and *Y. Enterocolitica* are available, in addition to citing their corresponding references.

Reviewer #2 (Comments for the Author):

I previously reviewed this manuscript and the authors have thoroughly addressed all of my initial concerns, which were minor. The methodology, software, and documentation are a very important contribution and will be of broad interest.

Reviewer #3 (Comments for the Author):

The authors have appropriately taken into account most of my comments.

Thank you to all reviewers. Your feedback greatly improved our manuscript.

June 16, 2021

Dr. Firas S Midani  
Baylor College of Medicine  
Molecular Virology and Microbiology  
Houston, TX 77098

Re: mSystems00508-21R1 (AMiGA: software for automated Analysis of Microbial Growth Assays)

Dear Dr. Firas S Midani:

Your manuscript has been accepted, and I am forwarding it to the ASM Journals Department for publication. For your reference, ASM Journals' address is given below. Before it can be scheduled for publication, your manuscript will be checked by the mSystems senior production editor, Ellie Ghatineh, to make sure that all elements meet the technical requirements for publication. She will contact you if anything needs to be revised before copyediting and production can begin. Otherwise, you will be notified when your proofs are ready to be viewed.

As an open-access publication, mSystems receives no financial support from paid subscriptions and depends on authors' prompt payment of publication fees as soon as their articles are accepted. You will be contacted separately about payment when the proofs are issued; please follow the instructions in that e-mail. Arrangements for payment must be made before your article is published. For a complete list of **Publication Fees**, including supplemental material costs, please visit our [website](#).

Corresponding authors may [join or renew ASM membership](#) to obtain discounts on publication fees. Need to upgrade your membership level? Please contact Customer Service at [Service@asmusa.org](mailto:Service@asmusa.org).

**For mSystems research articles**, you are welcome to submit a short author video for your recently accepted paper. Videos are normally 1 minute long and are a great opportunity for junior authors to get greater exposure. Importantly, this video will not hold up the publication of your paper, and you can submit it at any time.

Details of the video are:

- Minimum resolution of 1280 x 720
- .mov or .mp4. video format
- Provide video in the highest quality possible, but do not exceed 1080p
- Provide a still/profile picture that is 640 (w) x 720 (h) max
- Provide the script that was used

We recognize that the video files can become quite large, and so to avoid quality loss ASM suggests sending the video file via <https://www.wetransfer.com/>. When you have a final version of the video and the still ready to share, please send it to Ellie Ghatineh at [eghatineh@asmusa.org](mailto:eghatineh@asmusa.org).

Thank you for submitting your paper to mSystems.

Sincerely,

Rafael Silva-Rocha  
Editor, mSystems

Journals Department  
American Society for Microbiology  
1752 N St., NW  
Washington, DC 20036  
E-mail: [peerreview@asmusa.org](mailto:peerreview@asmusa.org)  
Phone: 1-202-942-9338

Fig S6: Accept  
Fig S1: Accept  
Table S1: Accept  
Data S1: Accept  
Fig S2: Accept  
Fig S5: Accept  
Fig S7: Accept  
Table S2: Accept  
Fig S4: Accept  
Fig S3: Accept
